# Supplementary material for: Association of Serum Chloride Levels with all-cause mortality among Patients in Surgical Intensive Care Unit: A Retrospective Analysis of the MIMIC-IV Database
Source: Research Square preprint supplement (doi:10.21203/rs.3.rs-4917440/v1), 2024-10-14
Supplement: Supplementary file 1 [file 60e2696018f9acf1535a15a4.docx]

| Supplementary Table 1. Missing data of the variables included in this study | |
| --- | --- |
|  | Complete rate |
| Age,years | 1 |
| Male,n(%) | 1 |
| Weight, kg | 0.995 |
| Myocardial infarct, n(%) | 1 |
| Heart failure, n(%) | 1 |
| Cerebrovascular disease, n(%) | 1 |
| COPD, n(%) | 1 |
| Liver disease, n(%) | 1 |
| Diabetes, n(%) | 1 |
| Renal disease, n(%) | 1 |
| Malignant cancer, n(%) | 1 |
| Hypertension, n(%) | 1 |
| AKI, n(%) | 1 |
| APS III | 1 |
| OASIS | 1 |
| SOFA | 0.997 |
| LODS | 1 |
| GCS | 0.997 |
| Heart rate,beats/min | 0.997 |
| SBP, mmHg | 0.997 |
| DBP,mmHG | 0.997 |
| Temperature, ℃ | 0.993 |
| Glucose,mmol/L | 0.999 |
| WBC,109/L | 0.995 |
| RBC,109/L | 0.995 |
| Platelet, 109/L | 0.995 |
| Calcium, mmol/L | 0.986 |
| Potassium, mmol/L | 1 |
| Sodium, mmol/L | 1 |
| Creatinine, umol/L | 0.999 |
| BUN, mg/dl | 0.999 |
| PT,sec | 0.816 |
| Ventilator, n(%) | 1 |
| CRRT, n(%) | 1 |
