# Supplementary material for: Association of Serum Chloride Levels with all-cause mortality among Patients in Surgical Intensive Care Unit: A Retrospective Analysis of the MIMIC-IV Database
Source: Research Square preprint supplement (doi:10.21203/rs.3.rs-4917440/v1), 2024-10-14
Supplement: Supplementary file 2 [file 99b2a43046fc08930c3931d1.docx]

Table 3. Subgroup analysis of the relationship between serum chloride and 30-day,90-day,180-day mortality

| Variables | 30-day mortality | | | 90-day mortality | | | 180-day mortality | | |
| --- | --- | --- | --- | --- | --- | --- | --- | --- | --- |
| HR (95%CI) | *P* | P for interaction | HR (95%CI) | *P* | P for interaction | HR (95%CI) | *P* | P for interaction |
| All patients | 0.79 (0.71 ~ 0.87) | <0.001 |  | 0.78 (0.71 ~ 0.86) | <0.001 |  | 0.78 (0.72 ~ 0.85) | <0.001 |  |
| Age |  |  | 0.002 |  |  | 0.002 |  |  | 0.001 |
| <63 | 0.63 (0.51 ~ 0.77) | <0.001 |  | 0.65 (0.54 ~ 0.77) | <0.001 |  | 0.65 (0.56 ~ 0.77) | <0.001 |  |
| >=63 | 0.91 (0.80 ~ 1.02) | 0.111 |  | 0.89 (0.80 ~ 0.99) | 0.033 |  | 0.89 (0.81 ~ 0.98) | 0.016 |  |
| Gender |  |  | 0.006 |  |  | 0.002 |  |  | <0.001 |
| Female | 0.68 (0.58 ~ 0.78) | <0.001 |  | 0.67 (0.59 ~ 0.77) | <0.001 |  | 0.67 (0.59 ~ 0.76) | <0.001 |  |
| Male | 0.90 (0.78 ~ 1.05) | 0.177 |  | 0.89 (0.78 ~ 1.01) | 0.073 |  | 0.89 (0.80 ~ 1.00) | 0.054 |  |
| Myocardial infarct |  |  | 0.476 |  |  | 0.868 |  |  | 0.844 |
| No | 0.81 (0.72 ~ 0.90) | <0.001 |  | 0.79 (0.72 ~ 0.87) | <0.001 |  | 0.79 (0.72 ~ 0.86) | <0.001 |  |
| Yes | 0.72 (0.53 ~ 0.96) | 0.028 |  | 0.77 (0.60 ~ 1.00) | 0.050 |  | 0.77 (0.61 ~ 0.98) | 0.034 |  |
| Cerebrovascular disease |  |  | 0.334 |  |  | 0.408 |  |  | 0.509 |
| No | 0.73 (0.64 ~ 0.84) | <0.001 |  | 0.74 (0.66 ~ 0.83) | <0.001 |  | 0.75 (0.68 ~ 0.83) | <0.001 |  |
| Yes | 0.82 (0.69 ~ 0.97) | 0.019 |  | 0.81 (0.69 ~ 0.94) | 0.005 |  | 0.80 (0.69 ~ 0.92) | 0.002 |  |
| COPD |  |  | 0.811 |  |  | 0.916 |  |  | 0.734 |
| No | 0.80 (0.71 ~ 0.90) | <0.001 |  | 0.79 (0.71 ~ 0.88) | <0.001 |  | 0.80 (0.73 ~ 0.88) | <0.001 |  |
| Yes | 0.77 (0.62 ~ 0.96) | 0.022 |  | 0.80 (0.66 ~ 0.96) | 0.014 |  | 0.77 (0.65 ~ 0.91) | 0.002 |  |
| Liver disease |  |  | 0.010 |  |  | 0.033 |  |  | 0.028 |
| No | 0.86 (0.76 ~ 0.96) | 0.010 |  | 0.83 (0.75 ~ 0.92) | <0.001 |  | 0.83 (0.76 ~ 0.91) | <0.001 |  |
| Yes | 0.59 (0.46 ~ 0.77) | <0.001 |  | 0.64 (0.51 ~ 0.80) | <0.001 |  | 0.64 (0.52 ~ 0.79) | <0.001 |  |
| Diabetes |  |  | 0.016 |  |  | 0.018 |  |  | 0.023 |
| No | 0.74 (0.66 ~ 0.83) | <0.001 |  | 0.74 (0.67 ~ 0.82) | <0.001 |  | 0.75 (0.68 ~ 0.82) | <0.001 |  |
| Yes | 1.00 (0.81 ~ 1.23) | 0.980 |  | 0.96 (0.80 ~ 1.15) | 0.642 |  | 0.94 (0.79 ~ 1.11) | 0.446 |  |
| Malignant cancer |  |  | 0.608 |  |  | 0.657 |  |  | 0.835 |
| No | 0.80 (0.71 ~ 0.90) | <0.001 |  | 0.80 (0.72 ~ 0.88) | <0.001 |  | 0.79 (0.72 ~ 0.86) | <0.001 |  |
| Yes | 0.74 (0.57 ~ 0.96) | 0.023 |  | 0.75 (0.61 ~ 0.92) | 0.006 |  | 0.79 (0.66 ~ 0.95) | 0.011 |  |
| Hypertension |  |  | 0.003 |  |  | 0.026 |  |  | 0.006 |
| No | 0.68 (0.59 ~ 0.79) | <0.001 |  | 0.71 (0.63 ~ 0.81) | <0.001 |  | 0.71 (0.63 ~ 0.79) | <0.001 |  |
| Yes | 0.94 (0.81 ~ 1.09) | 0.412 |  | 0.88 (0.77 ~ 1.00) | 0.054 |  | 0.89 (0.79 ~ 1.00) | 0.060 |  |

HR:Hazard Ratio, CI: Confidence Interval;COPD:Chronic Obstructive Pulmonary Disease.
