# Supplementary material for: Association of Serum Chloride Levels with all-cause mortality among Patients in Surgical Intensive Care Unit: A Retrospective Analysis of the MIMIC-IV Database
Source: Research Square preprint supplement (doi:10.21203/rs.3.rs-4917440/v1), 2024-10-14
Supplement: Supplementary file 3 [file a79424e0e2fce67771cb0612.docx]

| Variables | Model 1 | | Model 2 | | Model 3 | | Model 4 | |
| --- | --- | --- | --- | --- | --- | --- | --- | --- |
| HR(95% CI) | P-values | HR(95% CI) | P-values | HR(95% CI) | P-values | HR(95% CI) | P-values |
| **30 days mortality** | | | | | | | | |
| Serum Chloride(continuous) | 0.98 (0.97~ 0.99) | <0.001 | 0.99 (0.98 ~ 0.99) | 0.018 | 0.97 (0.96 ~ 0.98) | <0.001 | 0.96 (0.94 ~ 0.98) | <0.001 |
| **Serum Chloride(categorical)** | | | | | | | | |
| Q1 | 1.00 (Reference) |  | 1.00 (Reference) |  | 1.00 (Reference) |  | 1.00 (Reference) |  |
| Q2 | 0.67 (0.57 ~ 0.78) | <0.001 | 0.73 (0.63 ~ 0.86) | <0.001 | 0.72 (0.61 ~ 0.85) | <0.001 | 0.76 (0.64 ~ 0.89) | 0.001 |
| Q3 | 0.59 (0.51 ~ 0.68) | <0.001 | 0.69 (0.60 ~ 0.80) | <0.001 | 0.66 (0.56 ~ 0.78) | <0.001 | 0.67 (0.57 ~ 0.80) | <0.001 |
| Q4 | 0.74 (0.64 ~ 0.85) | <0.001 | 0.87 (0.75 ~ 1.01) | 0.060 | 0.73 (0.60 ~ 0.89) | 0.002 | 0.65 (0.53 ~ 0.79) | <0.001 |
| P for trend |  | <0.001 |  | 0.029 |  | 0.001 |  | <0.001 |
| **90 days mortality** | | | | | | | | |
| Serum Chloride(continuous) | 0.98 (0.97 ~ 0.99) | <0.001 | 0.99 (0.98 ~ 0.99) | 0.014 | 0.98 (0.97 ~ 0.99) | 0.001 | 0.97 (0.96 ~ 0.98) | <0.001 |
| **Serum Chloride(categorical)** | | | | | | | | |
| Q1 | 1.00 (Reference |  | 1.00 (Reference |  | 1.00 (Reference |  | 1.00 (Reference |  |
| Q2 | 0.67 (0.59 ~ 0.77) | <0.001 | 0.74 (0.65 ~ 0.84) | <0.001 | 0.75 (0.65 ~ 0.86) | <0.001 | 0.78 (0.67 ~ 0.90) | <0.001 |
| Q3 | 0.60 (0.53 ~ 0.68) | <0.001 | 0.71 (0.62 ~ 0.80) | <0.001 | 0.70 (0.61 ~ 0.81) | <0.001 | 0.71 (0.62 ~ 0.82) | <0.001 |
| Q4 | 0.72 (0.64 ~ 0.82) | <0.001 | 0.87 (0.76 ~ 0.98) | 0.026 | 0.79 (0.66 ~ 0.94) | 0.007 | 0.71 (0.59 ~ 0.84) | <0.001 |
| P for trend |  | <0.001 |  | 0.012 |  | 0.004 |  | <0.001 |
| **180 days mortality** | | | | | | | | |
| Serum Chloride(continuous) | 0.98 (0.97 ~ 0.98) | <0.001 | 0.99 (0.98 ~ 0.99) | 0.003 | 0.98 (0.97 ~ 0.99) | <0.001 | 0.97 (0.96 ~ 0.98) | <0.001 |
| **Serum Chloride(categorical)** | | | | | | | | |
| Q1 | 1.00 (Reference |  | 1.00 (Reference |  | 1.00 (Reference |  | 1.00 (Reference |  |
| Q2 | 0.69 (0.61 ~ 0.77) | <0.001 | 0.74 (0.66 ~ 0.84) | <0.001 | 0.75 (0.66 ~ 0.85) | <0.001 | 0.77 (0.68 ~ 0.88) | <0.001 |
| Q3 | 0.62 (0.56 ~ 0.70) | <0.001 | 0.73 (0.65 ~ 0.82) | <0.001 | 0.72 (0.63 ~ 0.82) | <0.001 | 0.73 (0.64 ~ 0.83) | <0.001 |
| Q4 | 0.70 (0.62 ~ 0.79) | <0.001 | 0.84 (0.75 ~ 0.95) | 0.004 | 0.76 (0.65 ~ 0.89) | <0.001 | 0.69 (0.59 ~ 0.80) | <0.001 |
| P for trend |  | <0.001 |  | 0.002 |  | <0.001 |  | <0.001 |

Table 2.Cox proportional hazard ratios for 30 days,90 days,180 days all-cause mortality HR:

Model1: Crude;

Model2: Adjust: Gender, Age, Weight;

Model3: Adjust: Gender, Age, Weight, Glucose, WBC, RBC, Platelet, Calcium, Potassium, Sodium, Creatinine, BUN, PT, Myocardial_infarct, Heart_failure, Cerebrovascular_disease, COPD, Liver_disease, Diabetes, Renal_disease, Malignant_cancer, Hypertension, AKI;

Model4: Adjust: Gender, Age, Weight, APSIII, OASIS, SOFA, LODS, GCS, Heart_rate, SBP, DBP, Temperature, Glucose, WBC, RBC, Platelet, Calcium, Potassium, Sodium, Creatinine, BUN, PT, Myocardial_infarct, Heart_failure, Cerebrovascular_disease, COPD, Liver_disease, Diabetes, Renal_disease, Malignant_cancer, Hypertension, AKI, Ventilator, CRRT;

HR:Hazard Ratio, CI: Confidence Interval;AKI：Acute Kidney Injury;SOFA:Sequential Organ Failure Assessment;APS:Acute Physiology Score;OASIS：Oxford Acute Severity of Illness Score;LODS:Lactate-Oxygenation-Derived Severity Score;GCS:Glasgow Coma Scale;COPD:Chronic Obstructive Pulmonary Disease;SBP:Systolic Blood Pressure;DBP:Diastolic Blood Pressure;WBC:White Blood Cell;RBC:Red Blood Cell;BUN:Blood Urea Nitrogen;PT:Prothrombin Time;CRRT:Continuous Renal Replacement Therapy;LOS:Length of Stay;ICU:Intensive Care Unit.
