# Supplementary material for: Association of Serum Chloride Levels with all-cause mortality among Patients in Surgical Intensive Care Unit: A Retrospective Analysis of the MIMIC-IV Database
Source: Research Square preprint supplement (doi:10.21203/rs.3.rs-4917440/v1), 2024-10-14
Supplement: Supplementary file 4 [file d7e427add88f8deabae2a7ad.docx]

Table 1 Characteristics and outcomes of participants categorized by serum chloride.

| Variables | Total (n = 10996) | Q1 (n = 2365) | Q2 (n = 2305) | Q3 (n = 3509) | Q4 (n = 2817) | *P* |
| --- | --- | --- | --- | --- | --- | --- |
|
| Age,years | 63.00 (51.00, 76.00) | 65.00 (53.00,77.00) | 64.00 (52.00,77.00) | 63.00 (50.00,75.00) | 62.00 (48.00,75.00) | <0.001 |
| Male,n(%) | 5984 (54.42) | 1336 (56.49) | 1301 (56.44) | 1929 (54.97) | 1418 (50.34) | <0.001 |
| Weight, kg | 77.70 (65.20, 92.50) | 78.00 (64.80,95.00) | 78.50 (65.60,94.00) | 78.50 (66.60,93.10) | 75.50 (64.20,90.00) | <0.001 |
| Myocardial infarct, n(%) | 855 (7.78) | 225 (9.51) | 185 (8.03) | 245 (6.98) | 200 (7.10) | 0.002 |
| Heart failure, n(%) | 1435 (13.05) | 476 (20.13) | 322 (13.97) | 372 (10.60) | 265 (9.41) | <0.001 |
| Cerebrovascular disease, n(%) | 2770 (25.19) | 488 (20.63) | 606 (26.29) | 980 (27.93) | 696 (24.71) | <0.001 |
| COPD, n(%) | 2293 (20.85) | 623 (26.34) | 500 (21.69) | 672 (19.15) | 498 (17.68) | <0.001 |
| Liver disease, n(%) | 1203 (10.94) | 372 (15.73) | 242 (10.50) | 324 (9.23) | 265 (9.41) | <0.001 |
| Diabetes, n(%) | 2402 (21.84) | 691 (29.22) | 536 (23.25) | 663 (18.89) | 512 (18.18) | <0.001 |
| Renal disease, n(%) | 1331 (12.10) | 427 (18.05) | 238 (10.33) | 353 (10.06) | 313 (11.11) | <0.001 |
| Malignant cancer, n(%) | 1630 (14.82) | 347 (14.67) | 390 (16.92) | 573 (16.33) | 320 (11.36) | <0.001 |
| Hypertension, n(%) | 4851 (44.12) | 1106 (46.77) | 1088 (47.20) | 1536 (43.77) | 1121 (39.79) | <0.001 |
| AKI, n(%) | 7596 (69.08) | 1757 (74.29) | 1588 (68.89) | 2325 (66.26) | 1926 (68.37) | <0.001 |
| APS III | 37.00 (28.00, 50.00) | 42.00 (31.00,56.00) | 36.00 (27.00,47.00) | 35.00 (26.00,46.00) | 38.00 (28.00,52.00) | <0.001 |
| OASIS | 30.00 (25.00, 36.00) | 31.00 (25.00,37.00) | 29.00 (24.00,36.00) | 29.00 (24.00,35.00) | 31.00 (26.00,37.00) | <0.001 |
| SOFA | 1.00 (0.00, 2.00) | 1.00 (0.00,2.00) | 1.00 (0.00,2.00) | 1.00 (0.00,2.00) | 1.00 (0.00,2.00) | <0.001 |
| LODS | 3.00 (2.00, 5.00) | 3.00 (2.00,6.00) | 3.00 (2.00,5.00) | 3.00 (2.00,5.00) | 3.00 (2.00,5.00) | <0.001 |
| GCS | 15.00 (15.00, 15.00) | 15.00 (15.00,15.00) | 15.00 (15.00,15.00) | 15.00 (15.00,15.00) | 15.00 (15.00,15.00) | <0.001 |
| Heart rate,beats/min | 87.00 (74.00, 100.00) | 90.00 (77.00,106.00) | 87.00 (75.00,100.00) | 85.00 (73.00,97.00) | 86.00 (73.00,101.00) | <0.001 |
| SBP, mmHg | 130.00 (113.00, 147.00) | 131.00 (112.00,148.00) | 132.00 (115.00,148.00) | 130.00 (114.00,147.00) | 126.00 (110.00,145.00) | <0.001 |
| DBP,mmHG | 69.00 (59.00, 81.00) | 70.00 (59.00,82.00) | 70.00 (60.00,82.00) | 69.00 (60.00,81.00) | 68.00 (58.00,79.00) | <0.001 |
| Temperature, ℃ | 36.78 (36.44, 37.11) | 36.83 (36.50,37.17) | 36.83 (36.50,37.17) | 36.72 (36.44,37.11) | 36.67 (36.33,37.06) | <0.001 |
| Glucose,mmol/L | 134.00 (111.00, 169.00) | 136.00 (111.00,178.00) | 138.00 (113.00,171.00) | 132.00 (110.00,163.00) | 133.00 (110.00,166.00) | <0.001 |
| WBC,109/L | 11.00 (8.00, 14.90) | 11.50 (8.20,15.90) | 11.10 (8.30,15.00) | 10.70 (7.90,14.30) | 11.00 (7.80,14.80) | <0.001 |
| RBC,109/L | 3.79 (3.28, 4.27) | 3.71 (3.15,4.27) | 3.92 (3.40,4.37) | 3.86 (3.37,4.29) | 3.65 (3.22,4.13) | <0.001 |
| Platelet, 109/L | 208.00 (157.00, 269.00) | 216.00 (157.00,285.00) | 217.00 (166.00,277.00) | 209.00 (160.00,266.00) | 195.00 (147.00,252.00) | <0.001 |
| Calcium, mmol/L | 8.40 (7.90, 8.90) | 8.50 (8.10,9.00) | 8.60 (8.10,9.00) | 8.40 (8.00,8.80) | 8.00 (7.50,8.53) | <0.001 |
| Potassium, mmol/L | 4.10 (3.70, 4.50) | 4.10 (3.70,4.60) | 4.10 (3.80,4.50) | 4.00 (3.70,4.40) | 4.00 (3.70,4.40) | <0.001 |
| Sodium, mmol/L | 139.00 (136.00, 141.00) | 135.00 (132.00,137.00) | 138.00 (136.00,140.00) | 139.00 (138.00,141.00) | 142.00 (140.00,144.00) | <0.001 |
| Creatinine, umol/L | 0.90 (0.70, 1.20) | 0.90 (0.70,1.50) | 0.90 (0.70,1.10) | 0.90 (0.70,1.10) | 0.90 (0.70,1.20) | <0.001 |
| BUN, mg/dl | 16.00 (12.00, 24.00) | 18.00 (12.00,30.00) | 16.00 (12.00,23.00) | 16.00 (11.00,22.00) | 16.00 (11.00,24.00) | <0.001 |
| PT,sec | 13.11 (12.10, 14.90) | 13.49 (12.20,15.70) | 13.00 (12.10,14.60) | 12.94 (12.03,14.50) | 13.36 (12.20,15.10) | <0.001 |
| Ventilator, n(%) | 8891 (80.86) | 1958 (82.79) | 1821 (79.00) | 2782 (79.28) | 2330 (82.71) | <0.001 |
| CRRT, n(%) | 310 (2.82) | 144 (6.09) | 52 (2.26) | 60 (1.71) | 54 (1.92) | <0.001 |
| Hospital LOS, days | 8.25 (4.93, 14.61) | 9.22 (5.53,16.41) | 7.96 (4.89,13.54) | 7.75 (4.67,13.52) | 8.46 (4.85,15.05) | <0.001 |
| ICU LOS, days | 2.58 (1.65, 4.99) | 2.76 (1.69,5.12) | 2.50 (1.64,4.76) | 2.29 (1.55,4.69) | 2.77 (1.72,5.78) | <0.001 |
| 30 Day death, n(%) | 1405 (12.78) | 405 (17.12) | 270 (11.71) | 367 (10.46) | 363 (12.89) | <0.001 |
| 90 Day death, n(%) | 1885 (17.14) | 539 (22.79) | 367 (15.92) | 503 (14.33) | 476 (16.90) | <0.001 |
| 180 Day death, n(%) | 2234 (20.32) | 630 (26.64) | 441 (19.13) | 618 (17.61) | 545 (19.35) | <0.001 |

Continuous variables are presented as medians (interquartile ranges), while categorical variables are reported as numbers (percentages). Statistical analyses included the Kruskal-Wallis test for continuous variables and the Chi-square test for categorical variables.Q1:61-101 mmol/L;Q2:101-104 mmol/L;Q3:104-108 mmol/L;Q4:108-140 mmol/L;AKI：Acute Kidney Injury;SOFA:Sequential Organ Failure Assessment;APS:Acute Physiology Score;OASIS：Oxford Acute Severity of Illness Score;LODS:Lactate-Oxygenation-Derived Severity Score;GCS:Glasgow Coma Scale;COPD:Chronic Obstructive Pulmonary Disease;SBP:Systolic Blood Pressure;DBP:Diastolic Blood Pressure;WBC:White Blood Cell;RBC:Red Blood Cell;BUN:Blood Urea Nitrogen;PT:Prothrombin Time;CRRT:Continuous Renal Replacement Therapy;LOS:Length of Stay;ICU:Intensive Care Unit.
